# Supplementary material for: Comparison of Prophylactic Intravenous Antibiotic Regimens After Endoprosthetic Reconstruction for Lower Extremity Bone Tumors: A Randomized Clinical Trial
Source: PubMed Central journal article supplement (PMC8739829; doi:10.1001/jamaoncol.2021.6628), 2022-01-06
Supplement: jamaoncol-e216628-s003.pdf [file jamaoncol-e216628-s003.pdf]

\*Indicates required information. Only first name, last name, and suffix will appear in PubMed.

| <b>*Group Name(s): The PARITY Investigators</b> |                   |                              |                  |                     |                                          |                                                                                                                            |                                                                                            |
|-------------------------------------------------|-------------------|------------------------------|------------------|---------------------|------------------------------------------|----------------------------------------------------------------------------------------------------------------------------|--------------------------------------------------------------------------------------------|
| <b>*First Name and Middle Initial(s)</b>        | <b>*Last Name</b> | <b>*Suffix (eg, Jr, III)</b> | Academic Degrees | Institution         | Location (city, state/province, country) | Role or Contribution, eg, chair, principal investigator                                                                    | Group (if more than 1 Group listed in the byline and/or Subgroup (eg, Steering Committee)) |
| Michelle                                        | Ghert             |                              | MD, FRCSC        | McMaster University | Hamilton, Ontario, Canada                | Chair (Steering Committee, Central Adjudication Committee), Principal Investigator (Juravinski Hospital and Cancer Centre) | Global Methods Center, Steering Committee, Central Adjudication Committee                  |
| Patricia                                        | Schneider         |                              | BSc              | McMaster University | Hamilton, Ontario, Canada                | Methods Center Research Personnel                                                                                          | Global Methods Center                                                                      |
| Victoria                                        | Giglio            |                              | MSc              | McMaster University | Hamilton, Ontario, Canada                | Methods Center Research Personnel                                                                                          | Global Methods Center                                                                      |
| Paula                                           | McKay             |                              | BSc              | McMaster University | Hamilton, Ontario, Canada                | Methods Center Research Personnel                                                                                          | Global Methods Center                                                                      |
| Andrew                                          | Duong             |                              | MSc              | McMaster University | Hamilton, Ontario, Canada                | Methods Center Research Personnel                                                                                          | Global Methods Center                                                                      |
| Nathan                                          | Evaniew           |                              | MD, PhD, FRCSC   | McMaster University | Hamilton, Ontario, Canada                | Methods Center Research Personnel                                                                                          | Global Methods Center                                                                      |
| Dana                                            | Ghanem            |                              | BSc              | McMaster University | Hamilton, Ontario, Canada                | Methods Center Research Personnel                                                                                          | Global Methods Center                                                                      |

## Supplemental Online Content: Nonauthor Collaborators

\*Indicates required information. Only first name, last name, and suffix will appear in PubMed.

| *First Name and Middle Initial(s) | *Last Name    | *Suffix (eg, Jr, III) | Academic Degrees | Institution         | Location (city, state/province, country) | Role or Contribution, eg, chair, principal investigator | Group (if more than 1 Group listed in the byline) and/or Subgroup (eg, Steering Committee) |
|-----------------------------------|---------------|-----------------------|------------------|---------------------|------------------------------------------|---------------------------------------------------------|--------------------------------------------------------------------------------------------|
| Callum                            | MacLeay       |                       | BSc              | McMaster University | Hamilton, Ontario, Canada                | Methods Center Research Personnel                       | Global Methods Center                                                                      |
| Kim                               | Madden        |                       | PhD              | McMaster University | Hamilton, Ontario, Canada                | Methods Center Research Personnel                       | Global Methods Center                                                                      |
| Antonella                         | Racano        |                       | DO               | McMaster University | Hamilton, Ontario, Canada                | Methods Center Research Personnel                       | Global Methods Center                                                                      |
| Taryn                             | Scott         |                       | MSW, MSc         | McMaster University | Hamilton, Ontario, Canada                | Methods Center Research Personnel                       | Global Methods Center                                                                      |
| Marilyn                           | Swinton       |                       | MSc              | McMaster University | Hamilton, Ontario, Canada                | Methods Center Research Personnel                       | Global Methods Center                                                                      |
| Nicole                            | Simunovic     |                       | MSc              | McMaster University | Hamilton, Ontario, Canada                | Methods Center Research Personnel                       | Global Methods Center                                                                      |
| Sheila                            | Sprague       |                       | PhD              | McMaster University | Hamilton, Ontario, Canada                | Methods Center Research Personnel                       | Global Methods Center                                                                      |
| Diane                             | Heels-Ansdell |                       | MSc              | McMaster University | Hamilton, Ontario, Canada                | Methods Center Research Personnel                       | Global Methods Center                                                                      |
| Lisa                              | Buckingham    |                       | BSc              | McMaster University | Hamilton, Ontario, Canada                | Methods Center Research Personnel                       | Global Methods Center                                                                      |

## Supplemental Online Content: Nonauthor Collaborators

\*Indicates required information. Only first name, last name, and suffix will appear in PubMed.

| *First Name and Middle Initial(s) | *Last Name | *Suffix (eg, Jr, III) | Academic Degrees | Institution                                               | Location (city, state/province, country) | Role or Contribution, eg, chair, principal investigator                               | Group (if more than 1 Group listed in the byline) and/or Subgroup (eg, Steering Committee) |
|-----------------------------------|------------|-----------------------|------------------|-----------------------------------------------------------|------------------------------------------|---------------------------------------------------------------------------------------|--------------------------------------------------------------------------------------------|
| Roberto                           | Vélez      |                       | MD, PhD          | Vall d'Hebron Institut de Recerca                         | Barcelona, Spain                         | Site Principal Investigator (Hospital Vall d'Hebron), Legal Authorized Representative | European Coordinating Center, Steering Committee                                           |
| Alba Lopez                        | Fernandez  |                       | PhD              | Vall d'Hebron Institut de Recerca, Hospital Vall d'Hebron | Barcelona, Spain                         | Site Research Personnel (Hospital Vall d'Hebron)                                      | European Coordinating Center                                                               |
| Olga Sánchez-Maroto               | Carrizo    |                       | MS               | Vall d'Hebron Institut de Recerca, Hospital Vall d'Hebron | Barcelona, Spain                         | European Coordinating Center Research Personnel                                       | European Coordinating Center                                                               |
| Mohit                             | Bhandari   |                       | MD, PhD, FRCSC   | McMaster University                                       | Hamilton, Ontario, Canada                | Co-Chair (Steering Committee)                                                         | Steering Committee                                                                         |
| Benjamin                          | Dehesi     |                       | MD, MSc, FRCSC   | McMaster University                                       | Hamilton, Ontario, Canada                | Site Co-investigator (Juravinski Hospital and Cancer Centre)                          | Steering Committee                                                                         |
| Gordon                            | Guyatt     |                       | MD               | McMaster University                                       | Hamilton, Ontario, Canada                |                                                                                       | Steering Committee                                                                         |
| Ginger                            | Holt       |                       | MD               | Vanderbilt University                                     | Nashville, Tennessee, U.S.A.             | Site Principal Investigator (Vanderbilt University Medical Center)                    | Steering Committee                                                                         |
| Timothy                           | O'Shea     |                       | MD, MPH          | McMaster University                                       | Hamilton, Ontario, Canada                |                                                                                       | Steering Committee, Central Adjudication Committee                                         |

## Supplemental Online Content: Nonauthor Collaborators

\*Indicates required information. Only first name, last name, and suffix will appear in PubMed.

| *First Name and Middle Initial(s) | *Last Name   | *Suffix (eg, Jr, III) | Academic Degrees | Institution                     | Location (city, state/province, country) | Role or Contribution, eg, chair, principal investigator                                                                        | Group (if more than 1 Group listed in the byline) and/or Subgroup (eg, Steering Committee) |
|-----------------------------------|--------------|-----------------------|------------------|---------------------------------|------------------------------------------|--------------------------------------------------------------------------------------------------------------------------------|--------------------------------------------------------------------------------------------|
| R. Lor                            | Randall      |                       | MD               | University of California, Davis | Davis, California, U.S.A.                | Site Principal Investigator (Huntsman Cancer Institute), Site Co-Investigator (University of California, Davis Medical Center) | Steering Committee, Central Adjudication Committee                                         |
| Lehana                            | Thabane      |                       | PhD              | McMaster University             | Hamilton, Ontario, Canada                |                                                                                                                                | Steering Committee                                                                         |
| Jay S.                            | Wunder       |                       | MD, FRCSC        | University of Toronto           | Toronto, Ontario, Canada                 | Site Co-investigator (Mount Sinai Hospital)                                                                                    | Steering Committee                                                                         |
| Robert                            | Turcotte     |                       | MD, FRCSC        | McGill University               | Montreal, Québec, Canada                 | Site Principal Investigator (McGill University Health Centre)                                                                  | Central Adjudication Committee                                                             |
| David                             | Wilson       |                       | MD, MASc, FRCSC  | McMaster University             | Hamilton, Ontario, Canada                | Site Co-investigator (Juravinski Hospital and Cancer Centre)                                                                   | Central Adjudication Committee                                                             |
| Peter                             | Rose         |                       | MD               | Mayo Clinic                     | Rochester, Minnesota, U.S.A.             | Chair (Data and Safety Monitoring Board)                                                                                       | Data and Safety Monitoring Board                                                           |
| Brian                             | Brigman      |                       | MD               | Duke University                 | Durham, North Carolina, U.S.A.           |                                                                                                                                | Data and Safety Monitoring Board                                                           |
| Eleanor                           | Pullenayegum |                       | PhD              | The Hospital for Sick Children  | Toronto, Ontario, Canada                 |                                                                                                                                | Data and Safety Monitoring Board                                                           |
| Peter C.                          | Ferguson     |                       | MD, FRCSC        | Mount Sinai Hospital            | Toronto, Ontario, Canada                 | Site Principal Investigator                                                                                                    |                                                                                            |

## Supplemental Online Content: Nonauthor Collaborators

\*Indicates required information. Only first name, last name, and suffix will appear in PubMed.

| *First Name and Middle Initial(s) | *Last Name  | *Suffix (eg, Jr, III) | Academic Degrees     | Institution                     | Location (city, state/province, country) | Role or Contribution, eg, chair, principal investigator | Group (if more than 1 Group listed in the byline) and/or Subgroup (eg, Steering Committee) |
|-----------------------------------|-------------|-----------------------|----------------------|---------------------------------|------------------------------------------|---------------------------------------------------------|--------------------------------------------------------------------------------------------|
| Anthony M.                        | Griffin     |                       | MSc                  | Mount Sinai Hospital            | Toronto, Ontario, Canada                 | Site Research Personnel                                 |                                                                                            |
| Gagan                             | Grewal      |                       | BSc, RPhT            | Mount Sinai Hospital            | Toronto, Ontario, Canada                 | Site Research Pharmacy Personnel                        |                                                                                            |
| Andrew                            | Han         |                       | BScPhm               | Mount Sinai Hospital            | Toronto, Ontario, Canada                 | Site Research Pharmacy Personnel                        |                                                                                            |
| Ionna                             | Mantas      |                       | BScPhm, ACPR, RPh    | Mount Sinai Hospital            | Toronto, Ontario, Canada                 | Site Research Pharmacy Personnel                        |                                                                                            |
| Andrew                            | Wylie       |                       | BScPhm, ACPR, PharmD | Mount Sinai Hospital            | Toronto, Ontario, Canada                 | Site Research Pharmacy Personnel                        |                                                                                            |
| Krista                            | Goulding    |                       | MD, MPH, FRCSC       | McGill University Health Centre | Montreal, Québec, Canada                 | Site Co-investigator                                    |                                                                                            |
| Nicole                            | Andersen    |                       | BSc                  | McGill University Health Centre | Montreal, Québec, Canada                 | Site Research Personnel                                 |                                                                                            |
| Olivier                           | Bouchereau  |                       | MSc                  | McGill University Health Centre | Montreal, Québec, Canada                 | Site Research Personnel                                 |                                                                                            |
| Firas                             | Dandachli   |                       | MD, MSc              | McGill University Health Centre | Montreal, Québec, Canada                 | Site Research Personnel                                 |                                                                                            |
| Mireille                          | Dessureault |                       | MSc                  | McGill University Health Centre | Montreal, Québec, Canada                 | Site Research Personnel                                 |                                                                                            |
| Steven                            | Salomon     |                       | MSc                  | McGill University Health Centre | Montreal, Québec, Canada                 | Site Research Personnel                                 |                                                                                            |
| Nathalie                          | Ste-Marie   |                       | MSc                  | McGill University Health Centre | Montreal, Québec, Canada                 | Site Research Personnel                                 |                                                                                            |

## Supplemental Online Content: Nonauthor Collaborators

\*Indicates required information. Only first name, last name, and suffix will appear in PubMed.

| *First Name and Middle Initial(s) | *Last Name | *Suffix (eg, Jr, III) | Academic Degrees | Institution                                                                                          | Location (city, state/province, country) | Role or Contribution, eg, chair, principal investigator                                                                                 | Group (if more than 1 Group listed in the byline) and/or Subgroup (eg, Steering Committee) |
|-----------------------------------|------------|-----------------------|------------------|------------------------------------------------------------------------------------------------------|------------------------------------------|-----------------------------------------------------------------------------------------------------------------------------------------|--------------------------------------------------------------------------------------------|
| Ariane                            | Lessard    |                       | PharmD           | McGill University Health Centre, CIUSSS de l'Est-de-l'Île-de-Montréal – Hôpital Maisonneuve-Rosemont | Montreal, Québec, Canada                 | Site Research Pharmacy Personnel (McGill University Health Centre, CIUSSS de l'Est-de-l'Île-de-Montréal – Hôpital Maisonneuve-Rosemont) |                                                                                            |
| Gilbert                           | Matte      |                       | PharmD           | McGill University Health Centre                                                                      | Montreal, Québec, Canada                 | Site Research Pharmacy Personnel                                                                                                        |                                                                                            |
| Zoe                               | Bond       |                       | BSc              | Juravinski Hospital and Cancer Centre                                                                | Hamilton, Ontario, Canada                | Site Research Personnel                                                                                                                 |                                                                                            |
| Bo Xuan                           | Lin        |                       | BSc              | Juravinski Hospital and Cancer Centre                                                                | Hamilton, Ontario, Canada                | Site Research Personnel                                                                                                                 |                                                                                            |
| Maya                              | Biljan     |                       | RPhT             | Juravinski Hospital and Cancer Centre                                                                | Hamilton, Ontario, Canada                | Site Research Pharmacy Personnel                                                                                                        |                                                                                            |
| Rita                              | Chan       |                       | BScPharm, MSc    | Juravinski Hospital and Cancer Centre                                                                | Hamilton, Ontario, Canada                | Site Research Pharmacy Personnel                                                                                                        |                                                                                            |
| Deanna                            | Cosentino  |                       | RPhT             | Juravinski Hospital and Cancer Centre                                                                | Hamilton, Ontario, Canada                | Site Research Pharmacy Personnel                                                                                                        |                                                                                            |
| Diane                             | Lourenco   |                       | RPhT             | Juravinski Hospital and Cancer Centre                                                                | Hamilton, Ontario, Canada                | Site Research Pharmacy Personnel                                                                                                        |                                                                                            |
| Brittany                          | Marriott   |                       | RPhT             | Juravinski Hospital and Cancer Centre                                                                | Hamilton, Ontario, Canada                | Site Research Pharmacy Personnel                                                                                                        |                                                                                            |

## Supplemental Online Content: Nonauthor Collaborators

\*Indicates required information. Only first name, last name, and suffix will appear in PubMed.

| *First Name and Middle Initial(s) | *Last Name | *Suffix (eg, Jr, III) | Academic Degrees | Institution                                                         | Location (city, state/province, country) | Role or Contribution, eg, chair, principal investigator | Group (if more than 1 Group listed in the byline) and/or Subgroup (eg, Steering Committee) |
|-----------------------------------|------------|-----------------------|------------------|---------------------------------------------------------------------|------------------------------------------|---------------------------------------------------------|--------------------------------------------------------------------------------------------|
| Gita                              | Sobhi      |                       | RPh              | Juravinski Hospital and Cancer Centre                               | Hamilton, Ontario, Canada                | Site Research Pharmacy Personnel                        |                                                                                            |
| Marc                              | Isler      |                       | MD, FRCSC        | CIUSSS de l'Est-de-l'Île-de-Montréal – Hôpital Maisonneuve-Rosemont | Montreal, Québec, Canada                 | Site Principal Investigator                             |                                                                                            |
| Sophie                            | Mottard    |                       | MD, FRCSC        | CIUSSS de l'Est-de-l'Île-de-Montréal – Hôpital Maisonneuve-Rosemont | Montreal, Québec, Canada                 | Site Co-investigator                                    |                                                                                            |
| Janie                             | Barry      |                       | MSc              | CIUSSS de l'Est-de-l'Île-de-Montréal – Hôpital Maisonneuve-Rosemont | Montreal, Québec, Canada                 | Site Research Personnel                                 |                                                                                            |
| Hugo                              | Saint-Yves |                       | MSc              | CIUSSS de l'Est-de-l'Île-de-Montréal – Hôpital Maisonneuve-Rosemont | Montreal, Québec, Canada                 | Site Research Personnel                                 |                                                                                            |
| Marysa                            | Bétournay  |                       |                  | CIUSSS de l'Est-de-l'Île-de-Montréal – Hôpital Maisonneuve-Rosemont | Montreal, Québec, Canada                 | Site Research Personnel                                 |                                                                                            |
| Marceline                         | Quach      |                       | BPharm, MSc      | CIUSSS de l'Est-de-l'Île-de-Montréal – Hôpital Maisonneuve-Rosemont | Montreal, Québec, Canada                 | Site Research Pharmacy Personnel                        |                                                                                            |
| Helen                             | Assayag    |                       | BPharm           | CIUSSS de l'Est-de-l'Île-de-Montréal – Hôpital Maisonneuve-Rosemont | Montreal, Québec, Canada                 | Site Research Pharmacy Personnel                        |                                                                                            |
| Karine                            | Daoust     |                       | BPharm           | CIUSSS de l'Est-de-l'Île-de-Montréal – Hôpital Maisonneuve-Rosemont | Montreal, Québec, Canada                 | Site Research Pharmacy Personnel                        |                                                                                            |
| Kristine                          | Goyette    |                       | BPharm           | CIUSSS de l'Est-de-l'Île-de-Montréal – Hôpital Maisonneuve-Rosemont | Montreal, Québec, Canada                 | Site Research Pharmacy Personnel                        |                                                                                            |

## Supplemental Online Content: Nonauthor Collaborators

\*Indicates required information. Only first name, last name, and suffix will appear in PubMed.

| *First Name and Middle Initial(s) | *Last Name       | *Suffix (eg, Jr, III) | Academic Degrees | Institution                                                         | Location (city, state/province, country) | Role or Contribution, eg, chair, principal investigator | Group (if more than 1 Group listed in the byline) and/or Subgroup (eg, Steering Committee) |
|-----------------------------------|------------------|-----------------------|------------------|---------------------------------------------------------------------|------------------------------------------|---------------------------------------------------------|--------------------------------------------------------------------------------------------|
| Denis                             | Projean          |                       | BPharm, PhD      | CIUSSS de l'Est-de-l'Île-de-Montréal – Hôpital Maisonneuve-Rosemont | Montreal, Québec, Canada                 | Site Research Pharmacy Personnel                        |                                                                                            |
| Millie                            | Lum              |                       | BPharm           | CIUSSS de l'Est-de-l'Île-de-Montréal – Hôpital Maisonneuve-Rosemont | Montreal, Québec, Canada                 | Site Research Pharmacy Personnel                        |                                                                                            |
| Maude                             | Bachand-Fournier |                       | BPharm           | CIUSSS de l'Est-de-l'Île-de-Montréal – Hôpital Maisonneuve-Rosemont | Montreal, Québec, Canada                 | Site Research Pharmacy Personnel                        |                                                                                            |
| Norbert                           | Dion             |                       | MD, FRCSC        | CHU de Québec – Université Laval                                    | Québec, Québec, Canada                   | Site Principal Investigator                             |                                                                                            |
| Annie                             | Arteau           |                       | MD, FRCSC        | CHU de Québec – Université Laval                                    | Québec, Québec, Canada                   | Site Co-investigator                                    |                                                                                            |
| Sylvie                            | Turmel           |                       | RN               | CHU de Québec – Université Laval                                    | Québec, Québec, Canada                   | Site Research Personnel                                 |                                                                                            |
| Anne                              | Bertrand         |                       | MSc              | CHU de Québec – Université Laval                                    | Québec, Québec, Canada                   | Site Research Pharmacy Personnel                        |                                                                                            |
| Manon                             | D'Amours         |                       | PTA              | CHU de Québec – Université Laval                                    | Québec, Québec, Canada                   | Site Research Pharmacy Personnel                        |                                                                                            |
| Lucie                             | Dallaire         |                       | MSc              | CHU de Québec – Université Laval                                    | Québec, Québec, Canada                   | Site Research Pharmacy Personnel                        |                                                                                            |
| Nancy                             | Gagnon           |                       | MSc              | CHU de Québec – Université Laval                                    | Québec, Québec, Canada                   | Site Research Pharmacy Personnel                        |                                                                                            |
| Lucie                             | Gosselin         |                       | MSc              | CHU de Québec – Université Laval                                    | Québec, Québec, Canada                   | Site Research Pharmacy Personnel                        |                                                                                            |



## Supplemental Online Content: Nonauthor Collaborators

\*Indicates required information. Only first name, last name, and suffix will appear in PubMed.

| *First Name and Middle Initial(s) | *Last Name | *Suffix (eg, Jr, III) | Academic Degrees | Institution                      | Location (city, state/province, country) | Role or Contribution, eg, chair, principal investigator | Group (if more than 1 Group listed in the byline) and/or Subgroup (eg, Steering Committee) |
|-----------------------------------|------------|-----------------------|------------------|----------------------------------|------------------------------------------|---------------------------------------------------------|--------------------------------------------------------------------------------------------|
| Gladys                            | Grenier    |                       | PTA              | CHU de Québec – Université Laval | Québec, Québec, Canada                   | Site Research Pharmacy Personnel                        |                                                                                            |
| Véronique                         | Labbé      |                       | MSc              | CHU de Québec – Université Laval | Québec, Québec, Canada                   | Site Research Pharmacy Personnel                        |                                                                                            |
| Tuong-Vi                          | Tran       |                       | MSc, PhD         | CHU de Québec – Université Laval | Québec, Québec, Canada                   | Site Research Pharmacy Personnel                        |                                                                                            |
| Paul                              | Clarkson   |                       | MBChB, MSc       | Vancouver General Hospital       | Vancouver, British Columbia, Canada      | Site Principal Investigator                             |                                                                                            |
| Lisa                              | Kondo      |                       | BScN, RN         | Vancouver General Hospital       | Vancouver, British Columbia, Canada      | Site Research Personnel                                 |                                                                                            |
| Baohua                            | Wang       |                       | PhD              | Vancouver General Hospital       | Vancouver, British Columbia, Canada      | Site Research Personnel                                 |                                                                                            |
| Judy                              | Yip        |                       | RPh              | Vancouver General Hospital       | Vancouver, British Columbia, Canada      | Site Research Pharmacy Personnel                        |                                                                                            |
| Joel                              | Werier     |                       | MD, FRCSC        | The Ottawa Hospital              | Ottawa, Ontario, Canada                  | Site Principal Investigator                             |                                                                                            |
| Hesham                            | Abdelbary  |                       | MD, MSc, FRCSC   | The Ottawa Hospital              | Ottawa, Ontario, Canada                  | Site Co-investigator                                    |                                                                                            |
| Yusra                             | Kassim     |                       | MD, PhD          | The Ottawa Hospital              | Ottawa, Ontario, Canada                  | Site Research Personnel                                 |                                                                                            |
| Heather                           | Cosgrove   |                       | BA               | The Ottawa Hospital              | Ottawa, Ontario, Canada                  | Site Research Personnel                                 |                                                                                            |
| Kimberly                          | Paquin     |                       | BA               | The Ottawa Hospital              | Ottawa, Ontario, Canada                  | Site Research Personnel                                 |                                                                                            |
| Anne-Marie                        | Dugal      |                       | RPhT             | The Ottawa Hospital              | Ottawa, Ontario, Canada                  | Site Research Pharmacy Personnel                        |                                                                                            |

## Supplemental Online Content: Nonauthor Collaborators

\*Indicates required information. Only first name, last name, and suffix will appear in PubMed.

| *First Name and Middle Initial(s) | *Last Name  | *Suffix (eg, Jr, III) | Academic Degrees | Institution                                 | Location (city, state/province, country) | Role or Contribution, eg, chair, principal investigator | Group (if more than 1 Group listed in the byline and/or Subgroup (eg, Steering Committee)) |
|-----------------------------------|-------------|-----------------------|------------------|---------------------------------------------|------------------------------------------|---------------------------------------------------------|--------------------------------------------------------------------------------------------|
| Susan                             | Fetzer      |                       | RPhT             | The Ottawa Hospital                         | Ottawa, Ontario, Canada                  | Site Research Pharmacy Personnel                        |                                                                                            |
| Wendy                             | Aikens      |                       | RPhT             | The Ottawa Hospital                         | Ottawa, Ontario, Canada                  | Site Research Pharmacy Personnel                        |                                                                                            |
| Shannon                           | Puloski     |                       | MD, FRCSC        | Foothills Medical Centre                    | Calgary, Alberta, Canada                 | Site Principal Investigator                             |                                                                                            |
| Michael                           | Monument    |                       | MD, MSc, FRCSC   | Foothills Medical Centre                    | Calgary, Alberta, Canada                 | Site Co-investigator                                    |                                                                                            |
| Kimberly                          | Carcary     |                       | MSc              | Foothills Medical Centre                    | Calgary, Alberta, Canada                 | Site Research Personnel                                 |                                                                                            |
| Olesja                            | Hazenbiller |                       | MSc              | Foothills Medical Centre                    | Calgary, Alberta, Canada                 | Site Research Personnel                                 |                                                                                            |
| Kayla                             | Kashluba    |                       | MSc              | Foothills Medical Centre                    | Calgary, Alberta, Canada                 | Site Research Personnel                                 |                                                                                            |
| Jimena                            | Rodriguez   |                       | MSc              | Foothills Medical Centre                    | Calgary, Alberta, Canada                 | Site Research Personnel                                 |                                                                                            |
| Candice                           | Cameron     |                       | BA, BSP, ACPR    | Foothills Medical Centre                    | Calgary, Alberta, Canada                 | Site Research Pharmacy Personnel                        |                                                                                            |
| Yee-Cheen                         | Doung       |                       | MD               | Oregon Health & Science University Hospital | Portland, Oregon, U.S.A.                 | Site Principal Investigator                             |                                                                                            |
| Kenneth                           | Gundle      |                       | MD               | Oregon Health & Science University Hospital | Portland, Oregon, U.S.A.                 | Site Co-investigator                                    |                                                                                            |
| James                             | Hayden      |                       | MD, PhD          | Oregon Health & Science University Hospital | Portland, Oregon, U.S.A.                 | Site Co-investigator                                    |                                                                                            |
| Christopher                       | Hart        |                       | MD               | Oregon Health & Science University Hospital | Portland, Oregon, U.S.A.                 | Site Research Personnel                                 |                                                                                            |
| David                             | Jenkins     |                       | BA               | Oregon Health & Science University Hospital | Portland, Oregon, U.S.A.                 | Site Research Personnel                                 |                                                                                            |

## Supplemental Online Content: Nonauthor Collaborators

\*Indicates required information. Only first name, last name, and suffix will appear in PubMed.

| *First Name and Middle Initial(s) | *Last Name | *Suffix (eg, Jr, III) | Academic Degrees | Institution                                 | Location (city, state/province, country) | Role or Contribution, eg, chair, principal investigator | Group (if more than 1 Group listed in the byline) and/or Subgroup (eg, Steering Committee) |
|-----------------------------------|------------|-----------------------|------------------|---------------------------------------------|------------------------------------------|---------------------------------------------------------|--------------------------------------------------------------------------------------------|
| Rebecca I.                        | Wetzel     |                       | BS               | Oregon Health & Science University Hospital | Portland, Oregon, U.S.A.                 | Site Research Personnel                                 |                                                                                            |
| Krista                            | Wolf       |                       | PharmD           | Oregon Health & Science University Hospital | Portland, Oregon, U.S.A.                 | Site Research Pharmacy Personnel                        |                                                                                            |
| Brooke                            | Bernard    |                       | PharmD           | Oregon Health & Science University Hospital | Portland, Oregon, U.S.A.                 | Site Research Pharmacy Personnel                        |                                                                                            |
| Sara                              | Bleffen    |                       | RPh              | Oregon Health & Science University Hospital | Portland, Oregon, U.S.A.                 | Site Research Pharmacy Personnel                        |                                                                                            |
| Kevin                             | Jones      |                       | MD               | Huntsman Cancer Institute                   | Salt Lake City, Utah, U.S.A.             | Site Principal Investigator                             |                                                                                            |
| John                              | Groundland |                       | MD, MS           | Huntsman Cancer Institute                   | Salt Lake City, Utah, U.S.A.             | Site Co-investigator                                    |                                                                                            |
| Susie                             | Crabtree   |                       | AS               | Huntsman Cancer Institute                   | Salt Lake City, Utah, U.S.A.             | Site Research Personnel                                 |                                                                                            |
| Jacqueline                        | Hart       |                       | AS               | Huntsman Cancer Institute                   | Salt Lake City, Utah, U.S.A.             | Site Research Personnel                                 |                                                                                            |
| Sara                              | Shaw       |                       | BS               | Huntsman Cancer Institute                   | Salt Lake City, Utah, U.S.A.             | Site Research Personnel                                 |                                                                                            |
| Rian                              | Davis      |                       | PharmD           | Huntsman Cancer Institute                   | Salt Lake City, Utah, U.S.A.             | Site Research Pharmacy Personnel                        |                                                                                            |
| Winter                            | Redd       |                       | PharmD           | Huntsman Cancer Institute                   | Salt Lake City, Utah, U.S.A.             | Site Research Pharmacy Personnel                        |                                                                                            |
| Susan                             | Sorenson   |                       | PharmD           | Huntsman Cancer Institute                   | Salt Lake City, Utah, U.S.A.             | Site Research Pharmacy Personnel                        |                                                                                            |

## Supplemental Online Content: Nonauthor Collaborators

\*Indicates required information. Only first name, last name, and suffix will appear in PubMed.

| *First Name and Middle Initial(s) | *Last Name | *Suffix (eg, Jr, III) | Academic Degrees | Institution                        | Location (city, state/province, country) | Role or Contribution, eg, chair, principal investigator | Group (if more than 1 Group listed in the byline and/or Subgroup (eg, Steering Committee)) |
|-----------------------------------|------------|-----------------------|------------------|------------------------------------|------------------------------------------|---------------------------------------------------------|--------------------------------------------------------------------------------------------|
| Benjamin                          | Miller     |                       | MD, MS           | Holden Comprehensive Cancer Center | Iowa City, Iowa, U.S.A.                  | Site Principal Investigator                             |                                                                                            |
| Mohammed                          | Milhem     |                       | MBBS             | Holden Comprehensive Cancer Center | Iowa City, Iowa, U.S.A.                  | Site Co-investigator                                    |                                                                                            |
| Jill                              | Kain       |                       | MSN, ARNP        | Holden Comprehensive Cancer Center | Iowa City, Iowa, U.S.A.                  | Site Co-investigator                                    |                                                                                            |
| Marian                            | Andersen   |                       | MA, CCRP         | Holden Comprehensive Cancer Center | Iowa City, Iowa, U.S.A.                  | Site Research Personnel                                 |                                                                                            |
| Kathryn                           | Hillburn   |                       | RN, BSN          | Holden Comprehensive Cancer Center | Iowa City, Iowa, U.S.A.                  | Site Research Personnel                                 |                                                                                            |
| Jennifer                          | Larson     |                       | AAS, CMA         | Holden Comprehensive Cancer Center | Iowa City, Iowa, U.S.A.                  | Site Research Personnel                                 |                                                                                            |
| Nancy                             | McCurdy    |                       | RN               | Holden Comprehensive Cancer Center | Iowa City, Iowa, U.S.A.                  | Site Research Personnel                                 |                                                                                            |
| Alyssa                            | Pratt      |                       | MS, CCRP         | Holden Comprehensive Cancer Center | Iowa City, Iowa, U.S.A.                  | Site Research Personnel                                 |                                                                                            |
| Mary                              | Schall     |                       | BSN              | Holden Comprehensive Cancer Center | Iowa City, Iowa, U.S.A.                  | Site Research Personnel                                 |                                                                                            |
| Theresa                           | Hobbs      |                       | BSP Pharm, RPh   | Holden Comprehensive Cancer Center | Iowa City, Iowa, U.S.A.                  | Site Research Pharmacy Personnel                        |                                                                                            |
| Kristine                          | Johnson    |                       | BSP Pharm, RPh   | Holden Comprehensive Cancer Center | Iowa City, Iowa, U.S.A.                  | Site Research Pharmacy Personnel                        |                                                                                            |
| Joanna                            | Nohr       |                       | PharmD           | Holden Comprehensive Cancer Center | Iowa City, Iowa, U.S.A.                  | Site Research Pharmacy Personnel                        |                                                                                            |
| Wendi                             | Slaughter  |                       | PharmD, RPh      | Holden Comprehensive Cancer Center | Iowa City, Iowa, U.S.A.                  | Site Research Pharmacy Personnel                        |                                                                                            |

## Supplemental Online Content: Nonauthor Collaborators

\*Indicates required information. Only first name, last name, and suffix will appear in PubMed.

| *First Name and Middle Initial(s) | *Last Name  | *Suffix (eg, Jr, III) | Academic Degrees | Institution                            | Location (city, state/province, country) | Role or Contribution, eg, chair, principal investigator | Group (if more than 1 Group listed in the byline) and/or Subgroup (eg, Steering Committee) |
|-----------------------------------|-------------|-----------------------|------------------|----------------------------------------|------------------------------------------|---------------------------------------------------------|--------------------------------------------------------------------------------------------|
| Jennifer                          | Halpern     |                       | MD               | Vanderbilt University Medical Center   | Nashville, Tennessee, U.S.A.             | Site Co-investigator                                    |                                                                                            |
| Herbert                           | Schwartz    |                       | MD               | Vanderbilt University Medical Center   | Nashville, Tennessee, U.S.A.             | Site Co-investigator                                    |                                                                                            |
| Julie                             | Daniels     |                       | CCRP             | Vanderbilt University Medical Center   | Nashville, Tennessee, U.S.A.             | Site Research Personnel                                 |                                                                                            |
| Eden                              | Schafer     |                       | MPH              | Vanderbilt University Medical Center   | Nashville, Tennessee, U.S.A.             | Site Research Personnel                                 |                                                                                            |
| M. Shane                          | Moore       |                       | PharmD           | Vanderbilt University Medical Center   | Nashville, Tennessee, U.S.A.             | Site Research Pharmacy Personnel                        |                                                                                            |
| John H.                           | Healey      |                       | MD               | Memorial Sloan Kettering Cancer Center | New York City, New York, U.S.A.          | Site Principal Investigator                             |                                                                                            |
| Kaity                             | Chang       |                       | MBA              | Memorial Sloan Kettering Cancer Center | New York City, New York, U.S.A.          | Site Research Personnel                                 |                                                                                            |
| Linda                             | Chen        |                       | MS               | Memorial Sloan Kettering Cancer Center | New York City, New York, U.S.A.          | Site Research Personnel                                 |                                                                                            |
| Olivera                           | Douvelis    |                       | BA               | Memorial Sloan Kettering Cancer Center | New York City, New York, U.S.A.          | Site Research Personnel                                 |                                                                                            |
| Jesse                             | Galle       |                       | BA               | Memorial Sloan Kettering Cancer Center | New York City, New York, U.S.A.          | Site Research Personnel                                 |                                                                                            |
| Marissa                           | Mezzancello |                       | MPH, MS          | Memorial Sloan Kettering Cancer Center | New York City, New York, U.S.A.          | Site Research Personnel                                 |                                                                                            |
| Yoely                             | Tavarez     |                       | BA               | Memorial Sloan Kettering Cancer Center | New York City, New York, U.S.A.          | Site Research Personnel                                 |                                                                                            |
| Brian                             | Del Corral  |                       | PharmD           | Memorial Sloan Kettering Cancer Center | New York City, New York, U.S.A.          | Site Research Pharmacy Personnel                        |                                                                                            |
| Sabrina                           | Lopez       |                       | PharmD           | Memorial Sloan Kettering Cancer Center | New York City, New York, U.S.A.          | Site Research Pharmacy Personnel                        |                                                                                            |

## Supplemental Online Content: Nonauthor Collaborators

\*Indicates required information. Only first name, last name, and suffix will appear in PubMed.

| *First Name and Middle Initial(s) | *Last Name | *Suffix (eg, Jr, III) | Academic Degrees   | Institution                                                   | Location (city, state/province, country) | Role or Contribution, eg, chair, principal investigator | Group (if more than 1 Group listed in the byline) and/or Subgroup (eg, Steering Committee) |
|-----------------------------------|------------|-----------------------|--------------------|---------------------------------------------------------------|------------------------------------------|---------------------------------------------------------|--------------------------------------------------------------------------------------------|
| Gerry                             | O'Neill    |                       | PharmD             | Memorial Sloan Kettering Cancer Center                        | New York City, New York, U.S.A.          | Site Research Pharmacy Personnel                        |                                                                                            |
| John                              | Abraham    |                       | MD                 | The Rothman Institute at Thomas Jefferson University Hospital | Philadelphia, Pennsylvania, U.S.A.       | Site Principal Investigator                             |                                                                                            |
| Scot                              | Brown      |                       | MD                 | The Rothman Institute at Thomas Jefferson University Hospital | Philadelphia, Pennsylvania, U.S.A.       | Site Co-investigator                                    |                                                                                            |
| Meghan                            | Angelos    |                       |                    | The Rothman Institute at Thomas Jefferson University Hospital | Philadelphia, Pennsylvania, U.S.A.       | Site Research Personnel                                 |                                                                                            |
| Keenan                            | Sobol      |                       | BS                 | The Rothman Institute at Thomas Jefferson University Hospital | Philadelphia, Pennsylvania, U.S.A.       | Site Research Personnel                                 |                                                                                            |
| John                              | Strony     |                       | BS                 | The Rothman Institute at Thomas Jefferson University Hospital | Philadelphia, Pennsylvania, U.S.A.       | Site Research Personnel                                 |                                                                                            |
| Braden                            | Rall       |                       | PharmD, BCPS, BCOP | The Rothman Institute at Thomas Jefferson University Hospital | Philadelphia, Pennsylvania, U.S.A.       | Site Research Pharmacy Personnel                        |                                                                                            |
| Melissa                           | Furio      |                       | PharmD             | The Rothman Institute at Thomas Jefferson University Hospital | Philadelphia, Pennsylvania, U.S.A.       | Site Research Pharmacy Personnel                        |                                                                                            |
| Linda                             | Sailor     |                       | PharmD             | The Rothman Institute at Thomas Jefferson University Hospital | Philadelphia, Pennsylvania, U.S.A.       | Site Research Pharmacy Personnel                        |                                                                                            |
| Rania                             | Sadaka     |                       | PharmD             | The Rothman Institute at Thomas Jefferson University Hospital | Philadelphia, Pennsylvania, U.S.A.       | Site Research Pharmacy Personnel                        |                                                                                            |

## Supplemental Online Content: Nonauthor Collaborators

\*Indicates required information. Only first name, last name, and suffix will appear in PubMed.

| *First Name and Middle Initial(s) | *Last Name | *Suffix (eg, Jr, III) | Academic Degrees         | Institution                                                   | Location (city, state/province, country) | Role or Contribution, eg, chair, principal investigator | Group (if more than 1 Group listed in the byline) and/or Subgroup (eg, Steering Committee) |
|-----------------------------------|------------|-----------------------|--------------------------|---------------------------------------------------------------|------------------------------------------|---------------------------------------------------------|--------------------------------------------------------------------------------------------|
| Lauren                            | Karel      |                       | PharmD, BCPS             | The Rothman Institute at Thomas Jefferson University Hospital | Philadelphia, Pennsylvania, U.S.A.       | Site Research Pharmacy Personnel                        |                                                                                            |
| David                             | Geller     |                       | MD                       | Montefiore Medical Center                                     | Bronx, New York, U.S.A.                  | Site Principal Investigator                             |                                                                                            |
| Bang                              | Hoang      |                       | MD                       | Montefiore Medical Center                                     | Bronx, New York, U.S.A.                  | Site Co-investigator                                    |                                                                                            |
| Janet                             | Tingling   |                       | AA, AS, BS, MS, MBA, PhD | Montefiore Medical Center                                     | Bronx, New York, U.S.A.                  | Site Research Personnel                                 |                                                                                            |
| Clemencia                         | Solorzano  |                       | PharmD, RPh              | Montefiore Medical Center                                     | Bronx, New York, U.S.A.                  | Site Research Pharmacy Personnel                        |                                                                                            |
| Rosanna                           | Wustrack   |                       | MD                       | University of California, San Francisco Medical Center        | San Francisco, California, U.S.A.        | Site Principal Investigator                             |                                                                                            |
| Richard                           | O'Donnell  |                       | MD                       | University of California, San Francisco Medical Center        | San Francisco, California, U.S.A.        | Site Co-investigator                                    |                                                                                            |
| Melissa                           | Zimel      |                       | MD                       | University of California, San Francisco Medical Center        | San Francisco, California, U.S.A.        | Site Co-investigator                                    |                                                                                            |
| Veronica                          | Andaya     |                       | BA                       | University of California, San Francisco Medical Center        | San Francisco, California, U.S.A.        | Site Research Personnel                                 |                                                                                            |
| Adrianna                          | Carrasco   |                       | BS                       | University of California, San Francisco Medical Center        | San Francisco, California, U.S.A.        | Site Research Personnel                                 |                                                                                            |
| Shirley                           | Chen       |                       | PharmD                   | University of California, San Francisco Medical Center        | San Francisco, California, U.S.A.        | Site Research Pharmacy Personnel                        |                                                                                            |
| Diana                             | Ng         |                       | PharmD                   | University of California, San Francisco Medical Center        | San Francisco, California, U.S.A.        | Site Research Pharmacy Personnel                        |                                                                                            |

## Supplemental Online Content: Nonauthor Collaborators

\*Indicates required information. Only first name, last name, and suffix will appear in PubMed.

| *First Name and Middle Initial(s) | *Last Name  | *Suffix (eg, Jr, III) | Academic Degrees     | Institution                                            | Location (city, state/province, country) | Role or Contribution, eg, chair, principal investigator | Group (if more than 1 Group listed in the byline) and/or Subgroup (eg, Steering Committee) |
|-----------------------------------|-------------|-----------------------|----------------------|--------------------------------------------------------|------------------------------------------|---------------------------------------------------------|--------------------------------------------------------------------------------------------|
| Yelena                            | Koplowicz   |                       | PharmD               | University of California, San Francisco Medical Center | San Francisco, California, U.S.A.        | Site Research Pharmacy Personnel                        |                                                                                            |
| André                             | Spiguel     |                       | MD                   | University of Florida Health Shands Hospital           | Gainesville, Florida, U.S.A.             | Site Principal Investigator                             |                                                                                            |
| Chung Ming                        | Chan        |                       | MD                   | University of Florida Health Shands Hospital           | Gainesville, Florida, U.S.A.             | Site Co-investigator                                    |                                                                                            |
| Charles Parker                    | Gibbs       |                       | MD                   | University of Florida Health Shands Hospital           | Gainesville, Florida, U.S.A.             | Site Co-investigator                                    |                                                                                            |
| Mark                              | Scarborough |                       | MD                   | University of Florida Health Shands Hospital           | Gainesville, Florida, U.S.A.             | Site Co-investigator                                    |                                                                                            |
| MaryBeth                          | Horodyski   |                       | EdD, LAT, ATC, FNATA | University of Florida Health Shands Hospital           | Gainesville, Florida, U.S.A.             | Site Co-investigator                                    |                                                                                            |
| Johanna                           | Carmona     |                       | LPN                  | University of Florida Health Shands Hospital           | Gainesville, Florida, U.S.A.             | Site Research Personnel                                 |                                                                                            |
| Alana                             | Jackson     |                       | MS                   | University of Florida Health Shands Hospital           | Gainesville, Florida, U.S.A.             | Site Research Personnel                                 |                                                                                            |
| Aimee                             | Struk       |                       | Med, MBA, LAT, ATC   | University of Florida Health Shands Hospital           | Gainesville, Florida, U.S.A.             | Site Research Personnel                                 |                                                                                            |
| Susan                             | Beltz       |                       | PharmD               | University of Florida Health Shands Hospital           | Gainesville, Florida, U.S.A.             | Site Research Pharmacy Personnel                        |                                                                                            |
| Justin C.                         | Giaquinta   |                       | PharmD               | University of Florida Health Shands Hospital           | Gainesville, Florida, U.S.A.             | Site Research Pharmacy Personnel                        |                                                                                            |
| Melissa                           | Johnson     |                       | PharmD               | University of Florida Health Shands Hospital           | Gainesville, Florida, U.S.A.             | Site Research Pharmacy Personnel                        |                                                                                            |



## Supplemental Online Content: Nonauthor Collaborators

\*Indicates required information. Only first name, last name, and suffix will appear in PubMed.

| *First Name and Middle Initial(s) | *Last Name   | *Suffix (eg, Jr, III) | Academic Degrees | Institution                     | Location (city, state/province, country) | Role or Contribution, eg, chair, principal investigator | Group (if more than 1 Group listed in the byline) and/or Subgroup (eg, Steering Committee) |
|-----------------------------------|--------------|-----------------------|------------------|---------------------------------|------------------------------------------|---------------------------------------------------------|--------------------------------------------------------------------------------------------|
| Edward Y.                         | Cheng        |                       | MD               | University of Minnesota         | Minneapolis, Minnesota, U.S.A.           | Site Principal Investigator                             |                                                                                            |
| Julie                             | Agel         |                       | MA, ATC          | University of Minnesota         | Minneapolis, Minnesota, U.S.A.           | Site Research Personnel                                 |                                                                                            |
| Theresa                           | Christiansen |                       | RPh              | University of Minnesota         | Minneapolis, Minnesota, U.S.A.           | Site Research Pharmacy Personnel                        |                                                                                            |
| Derek                             | LaBar        |                       | PharmD           | University of Minnesota         | Minneapolis, Minnesota, U.S.A.           | Site Research Pharmacy Personnel                        |                                                                                            |
| Darlette                          | Luke         |                       | RPh              | University of Minnesota         | Minneapolis, Minnesota, U.S.A.           | Site Research Pharmacy Personnel                        |                                                                                            |
| Raffi                             | Avedian      |                       | MD               | Stanford University Health Care | Palo Alto, California, U.S.A.            | Site Principal Investigator                             |                                                                                            |
| Linda                             | Jordan       |                       | PA-C             | Stanford University Health Care | Palo Alto, California, U.S.A.            | Site Research Personnel                                 |                                                                                            |
| Deborah                           | Kenney       |                       | MS, OTR          | Stanford University Health Care | Palo Alto, California, U.S.A.            | Site Research Personnel                                 |                                                                                            |
| Steven                            | Chinn        |                       | PharmD           | Stanford University Health Care | Palo Alto, California, U.S.A.            | Site Research Pharmacy Personnel                        |                                                                                            |
| Martha                            | Hamilton     |                       | PharmD           | Stanford University Health Care | Palo Alto, California, U.S.A.            | Site Research Pharmacy Personnel                        |                                                                                            |
| Scott                             | Mayeda       |                       | PharmD           | Stanford University Health Care | Palo Alto, California, U.S.A.            | Site Research Pharmacy Personnel                        |                                                                                            |
| Carol                             | Morris       |                       | MD, MS           | Johns Hopkins Hospital          | Baltimore, Maryland, U.S.A.              | Site Principal Investigator                             |                                                                                            |

## Supplemental Online Content: Nonauthor Collaborators

\*Indicates required information. Only first name, last name, and suffix will appear in PubMed.

| *First Name and Middle Initial(s) | *Last Name | *Suffix (eg, Jr, III) | Academic Degrees | Institution                | Location (city, state/province, country) | Role or Contribution, eg, chair, principal investigator                                        | Group (if more than 1 Group listed in the byline) and/or Subgroup (eg, Steering Committee) |
|-----------------------------------|------------|-----------------------|------------------|----------------------------|------------------------------------------|------------------------------------------------------------------------------------------------|--------------------------------------------------------------------------------------------|
| Adam                              | Levin      |                       | MD               | Johns Hopkins Hospital     | Baltimore, Maryland, U.S.A.              | Site Co-investigator                                                                           |                                                                                            |
| Kari                              | Albery     |                       | PA-C             | Johns Hopkins Hospital     | Baltimore, Maryland, U.S.A.              | Site Research Personnel                                                                        |                                                                                            |
| Jennifer                          | Giordano   |                       | CRNP             | Johns Hopkins Hospital     | Baltimore, Maryland, U.S.A.              | Site Research Personnel                                                                        |                                                                                            |
| Vaishali                          | Laljani    |                       |                  | Johns Hopkins Hospital     | Baltimore, Maryland, U.S.A.              | Site Research Personnel                                                                        |                                                                                            |
| Anne                              | Delisa     |                       | PharmD           | Johns Hopkins Hospital     | Baltimore, Maryland, U.S.A.              | Site Research Pharmacy Personnel                                                               |                                                                                            |
| Nathan                            | Mesko      |                       | MD               | The Cleveland Clinic       | Cleveland, Ohio, U.S.A.                  | Site Principal Investigator                                                                    |                                                                                            |
| Lukas                             | Nystrom    |                       | MD               | The Cleveland Clinic       | Cleveland, Ohio, U.S.A.                  | Site Co-investigator                                                                           |                                                                                            |
| Matthew                           | Rerko      |                       |                  | The Cleveland Clinic       | Cleveland, Ohio, U.S.A.                  | Site Research Personnel                                                                        |                                                                                            |
| Heather                           | Keaney     |                       | MPH              | The Cleveland Clinic       | Cleveland, Ohio, U.S.A.                  | Site Research Personnel                                                                        |                                                                                            |
| Rachael                           | Yim        |                       | PharmD, MPH      | The Cleveland Clinic       | Cleveland, Ohio, U.S.A.                  | Site Research Pharmacy Personnel                                                               |                                                                                            |
| John                              | Petrich    |                       | MS, RPh          | The Cleveland Clinic       | Cleveland, Ohio, U.S.A.                  | Site Research Pharmacy Personnel                                                               |                                                                                            |
| Megan E.                          | Anderson   |                       | MD               | Boston Children's Hospital | Boston, Massachusetts, U.S.A.            | Site Principal Investigator (Boston Children's Hospital, Beth Israel Deaconess Medical Center) |                                                                                            |

## Supplemental Online Content: Nonauthor Collaborators

\*Indicates required information. Only first name, last name, and suffix will appear in PubMed.

| *First Name and Middle Initial(s) | *Last Name  | *Suffix (eg, Jr, III) | Academic Degrees | Institution                | Location (city, state/province, country) | Role or Contribution, eg, chair, principal investigator                                 | Group (if more than 1 Group listed in the byline) and/or Subgroup (eg, Steering Committee) |
|-----------------------------------|-------------|-----------------------|------------------|----------------------------|------------------------------------------|-----------------------------------------------------------------------------------------|--------------------------------------------------------------------------------------------|
| Mark C.                           | Gebhardt    |                       | MD               | Boston Children's Hospital | Boston, Massachusetts, U.S.A.            | Site Co-investigator (Boston Children's Hospital, Beth Israel Deaconess Medical Center) |                                                                                            |
| Benjamin                          | Allar       |                       | MD               | Boston Children's Hospital | Boston, Massachusetts, U.S.A.            | Site Research Personnel                                                                 |                                                                                            |
| Michael                           | Greenberg   |                       | BS               | Boston Children's Hospital | Boston, Massachusetts, U.S.A.            | Site Research Personnel                                                                 |                                                                                            |
| Manahil                           | Naqvi       |                       | MS               | Boston Children's Hospital | Boston, Massachusetts, U.S.A.            | Site Research Personnel                                                                 |                                                                                            |
| Ellis                             | Prather     |                       | MBA              | Boston Children's Hospital | Boston, Massachusetts, U.S.A.            | Site Research Personnel                                                                 |                                                                                            |
| Emily                             | Rademacher  |                       | BS               | Boston Children's Hospital | Boston, Massachusetts, U.S.A.            | Site Research Personnel                                                                 |                                                                                            |
| Jodie                             | Shea        |                       | BS               | Boston Children's Hospital | Boston, Massachusetts, U.S.A.            | Site Research Personnel                                                                 |                                                                                            |
| James                             | Bennett     |                       | PharmD           | Boston Children's Hospital | Boston, Massachusetts, U.S.A.            | Site Research Pharmacy Personnel                                                        |                                                                                            |
| Stacey                            | Albuquerque |                       | BS, PharmD       | Boston Children's Hospital | Boston, Massachusetts, U.S.A.            | Site Research Pharmacy Personnel                                                        |                                                                                            |
| Michael                           | Giarrusso   |                       | PharmD           | Boston Children's Hospital | Boston, Massachusetts, U.S.A.            | Site Research Pharmacy Personnel                                                        |                                                                                            |

Supplemental Online Content: Nonauthor Collaborators

\*Indicates required information. Only first name, last name, and suffix will appear in PubMed.

| *First Name and Middle Initial(s) | *Last Name | *Suffix (eg, Jr, III) | Academic Degrees   | Institution                                            | Location (city, state/province, country) | Role or Contribution, eg, chair, principal investigator                                                                               | Group (if more than 1 Group listed in the byline) and/or Subgroup (eg, Steering Committee) |
|-----------------------------------|------------|-----------------------|--------------------|--------------------------------------------------------|------------------------------------------|---------------------------------------------------------------------------------------------------------------------------------------|--------------------------------------------------------------------------------------------|
| Albert J.                         | Aboulaflia |                       | MD, MBA            | MedStar Georgetown Cancer Institute at Franklin Square | Baltimore, Maryland, U.S.A.              | Site Principal Investigator (MedStar Georgetown Cancer Institute at Franklin Square, Sinai Hospital of Baltimore [Lifebridge Health]) |                                                                                            |
| Matthew T.                        | Wallace    |                       | MD, MBA            | MedStar Georgetown Cancer Institute at Franklin Square | Baltimore, Maryland, U.S.A.              | Site Co-investigator (MedStar Georgetown Cancer Institute at Franklin Square, Sinai Hospital of Baltimore [Lifebridge Health])        |                                                                                            |
| Sally                             | Brown      |                       | RN, BSN, MGA, OCN  | MedStar Georgetown Cancer Institute at Franklin Square | Baltimore, Maryland, U.S.A.              | Site Research Personnel                                                                                                               |                                                                                            |
| Janice                            | Fowler     |                       |                    | MedStar Georgetown Cancer Institute at Franklin Square | Baltimore, Maryland, U.S.A.              | Site Research Personnel                                                                                                               |                                                                                            |
| Jean                              | Flack      |                       | RN, BSN, OCN, CCRC | MedStar Georgetown Cancer Institute at Franklin Square | Baltimore, Maryland, U.S.A.              | Site Research Personnel                                                                                                               |                                                                                            |
| Rick                              | Battersby  |                       | RPh                | MedStar Georgetown Cancer Institute at Franklin Square | Baltimore, Maryland, U.S.A.              | Site Research Pharmacy Personnel                                                                                                      |                                                                                            |

## Supplemental Online Content: Nonauthor Collaborators

\*Indicates required information. Only first name, last name, and suffix will appear in PubMed.

| *First Name and Middle Initial(s) | *Last Name  | *Suffix (eg, Jr, III) | Academic Degrees | Institution                                            | Location (city, state/province, country) | Role or Contribution, eg, chair, principal investigator | Group (if more than 1 Group listed in the byline and/or Subgroup (eg, Steering Committee)) |
|-----------------------------------|-------------|-----------------------|------------------|--------------------------------------------------------|------------------------------------------|---------------------------------------------------------|--------------------------------------------------------------------------------------------|
| Chad                              | Taylor      |                       | PharmD           | MedStar Georgetown Cancer Institute at Franklin Square | Baltimore, Maryland, U.S.A.              | Site Research Pharmacy Personnel                        |                                                                                            |
| David                             | Greenberg   |                       | MD               | Saint Louis University                                 | St. Louis, Missouri, U.S.A.              | Site Principal Investigator                             |                                                                                            |
| Sarah                             | Dawson      |                       | RN, BSN          | Saint Louis University                                 | St. Louis, Missouri, U.S.A.              | Site Research Personnel                                 |                                                                                            |
| Adam                              | Riebeling   |                       | PharmD           | Saint Louis University                                 | St. Louis, Missouri, U.S.A.              | Site Research Pharmacy Personnel                        |                                                                                            |
| Anna                              | Schmidt     |                       | PharmD           | Saint Louis University                                 | St. Louis, Missouri, U.S.A.              | Site Research Pharmacy Personnel                        |                                                                                            |
| Eric                              | Henderson   |                       | MD               | Dartmouth-Hitchcock Medical Center                     | Lebanon, New Hampshire, U.S.A.           | Site Principal Investigator                             |                                                                                            |
| Peter                             | DePalo      | Sr                    | BS, CCRP, CPhT   | Dartmouth-Hitchcock Medical Center                     | Lebanon, New Hampshire, U.S.A.           | Site Research Personnel                                 |                                                                                            |
| Lisa                              | Mack        |                       | RN               | Dartmouth-Hitchcock Medical Center                     | Lebanon, New Hampshire, U.S.A.           | Site Research Personnel                                 |                                                                                            |
| Christine                         | Neely-Jones |                       | RN               | Dartmouth-Hitchcock Medical Center                     | Lebanon, New Hampshire, U.S.A.           | Site Research Personnel                                 |                                                                                            |
| Crystallee                        | Newton      |                       | BA, CCRC         | Dartmouth-Hitchcock Medical Center                     | Lebanon, New Hampshire, U.S.A.           | Site Research Personnel                                 |                                                                                            |
| Daniel                            | Ressler     |                       | BA               | Dartmouth-Hitchcock Medical Center                     | Lebanon, New Hampshire, U.S.A.           | Site Research Personnel                                 |                                                                                            |
| Holly                             | Symonds     |                       | CCRC             | Dartmouth-Hitchcock Medical Center                     | Lebanon, New Hampshire, U.S.A.           | Site Research Personnel                                 |                                                                                            |
| Iryna                             | Gardner     |                       | CPhT             | Dartmouth-Hitchcock Medical Center                     | Lebanon, New Hampshire, U.S.A.           | Site Research Pharmacy Personnel                        |                                                                                            |

## Supplemental Online Content: Nonauthor Collaborators

\*Indicates required information. Only first name, last name, and suffix will appear in PubMed.

| *First Name and Middle Initial(s) | *Last Name      | *Suffix (eg, Jr, III) | Academic Degrees | Institution                        | Location (city, state/province, country) | Role or Contribution, eg, chair, principal investigator | Group (if more than 1 Group listed in the byline) and/or Subgroup (eg, Steering Committee) |
|-----------------------------------|-----------------|-----------------------|------------------|------------------------------------|------------------------------------------|---------------------------------------------------------|--------------------------------------------------------------------------------------------|
| Douglas                           | Parr            |                       | PharmD           | Dartmouth-Hitchcock Medical Center | Lebanon, New Hampshire, U.S.A.           | Site Research Pharmacy Personnel                        |                                                                                            |
| Victoria                          | Poisson         |                       | CPhT             | Dartmouth-Hitchcock Medical Center | Lebanon, New Hampshire, U.S.A.           | Site Research Pharmacy Personnel                        |                                                                                            |
| David                             | Rozolsky        |                       | PharmD           | Dartmouth-Hitchcock Medical Center | Lebanon, New Hampshire, U.S.A.           | Site Research Pharmacy Personnel                        |                                                                                            |
| Patrick                           | Teune           |                       | PharmD           | Dartmouth-Hitchcock Medical Center | Lebanon, New Hampshire, U.S.A.           | Site Research Pharmacy Personnel                        |                                                                                            |
| Joseph                            | Schwab          |                       | MD               | Massachusetts General Hospital     | Boston, Massachusetts, U.S.A.            | Site Principal Investigator                             |                                                                                            |
| Santiago A.                       | Lozano-Calderon |                       | MD, PhD          | Massachusetts General Hospital     | Boston, Massachusetts, U.S.A.            | Site Co-investigator                                    |                                                                                            |
| Jonathan                          | Baker           |                       | BS               | Massachusetts General Hospital     | Boston, Massachusetts, U.S.A.            | Site Research Personnel                                 |                                                                                            |
| Emily Ann                         | Berner          |                       | BS               | Massachusetts General Hospital     | Boston, Massachusetts, U.S.A.            | Site Research Personnel                                 |                                                                                            |
| Gi Hye                            | Im              |                       | BA               | Massachusetts General Hospital     | Boston, Massachusetts, U.S.A.            | Site Research Personnel                                 |                                                                                            |
| Jason                             | Kim             |                       | BS               | Massachusetts General Hospital     | Boston, Massachusetts, U.S.A.            | Site Research Personnel                                 |                                                                                            |
| Christine                         | Park            |                       | BS               | Massachusetts General Hospital     | Boston, Massachusetts, U.S.A.            | Site Research Personnel                                 |                                                                                            |
| Rishabh                           | Phukan          |                       | BS               | Massachusetts General Hospital     | Boston, Massachusetts, U.S.A.            | Site Research Personnel                                 |                                                                                            |
| Zachary                           | Wright          |                       | BS               | Massachusetts General Hospital     | Boston, Massachusetts, U.S.A.            | Site Research Personnel                                 |                                                                                            |

## Supplemental Online Content: Nonauthor Collaborators

\*Indicates required information. Only first name, last name, and suffix will appear in PubMed.

| *First Name and Middle Initial(s) | *Last Name | *Suffix (eg, Jr, III) | Academic Degrees | Institution                                      | Location (city, state/province, country) | Role or Contribution, eg, chair, principal investigator | Group (if more than 1 Group listed in the byline) and/or Subgroup (eg, Steering Committee) |
|-----------------------------------|------------|-----------------------|------------------|--------------------------------------------------|------------------------------------------|---------------------------------------------------------|--------------------------------------------------------------------------------------------|
| Sarah                             | Yeates     |                       | BS               | Massachusetts General Hospital                   | Boston, Massachusetts, U.S.A.            | Site Research Personnel                                 |                                                                                            |
| Lalit                             | Joshi      |                       | RPh              | Massachusetts General Hospital                   | Boston, Massachusetts, U.S.A.            | Site Research Pharmacy Personnel                        |                                                                                            |
| Timothy                           | Damron     |                       | MD               | State University of New York Upstate Orthopedics | Syracuse, New York, U.S.A.               | Site Principal Investigator                             |                                                                                            |
| Tina                              | Craig      |                       | CCRP             | State University of New York Upstate Orthopedics | Syracuse, New York, U.S.A.               | Site Research Personnel                                 |                                                                                            |
| Melissa                           | Reale      |                       |                  | State University of New York Upstate Orthopedics | Syracuse, New York, U.S.A.               | Site Research Pharmacy Personnel                        |                                                                                            |
| Matthew R.                        | DiCaprio   |                       | MD               | Albany Medical Center                            | Albany, New York, U.S.A.                 | Site Principal Investigator                             |                                                                                            |
| Bradford A.                       | Palmer     |                       | RPA-C            | Albany Medical Center                            | Albany, New York, U.S.A.                 | Site Co-investigator                                    |                                                                                            |
| Toni                              | Schaeffer  |                       | PharmD           | Albany Medical Center                            | Albany, New York, U.S.A.                 | Site Research Pharmacy Personnel                        |                                                                                            |
| Elena                             | Cioppa     |                       | RPh, MS          | Albany Medical Center                            | Albany, New York, U.S.A.                 | Site Research Pharmacy Personnel                        |                                                                                            |
| John C.                           | Neilson    |                       | MD               | Froedtert Hospital                               | Milwaukee, Wisconsin, U.S.A.             | Site Principal Investigator                             |                                                                                            |
| David M.                          | King       |                       | MD               | Froedtert Hospital                               | Milwaukee, Wisconsin, U.S.A.             | Site Co-investigator                                    |                                                                                            |
| Adam N.                           | Wooldridge |                       | MD, MPH          | Froedtert Hospital                               | Milwaukee, Wisconsin, U.S.A.             | Site Co-investigator                                    |                                                                                            |
| Karen C.                          | Gonzalez   |                       | MS, CCRP         | Froedtert Hospital                               | Milwaukee, Wisconsin, U.S.A.             | Site Research Personnel                                 |                                                                                            |

## Supplemental Online Content: Nonauthor Collaborators

\*Indicates required information. Only first name, last name, and suffix will appear in PubMed.

| *First Name and Middle Initial(s) | *Last Name | *Suffix (eg, Jr, III) | Academic Degrees | Institution                                          | Location (city, state/province, country) | Role or Contribution, eg, chair, principal investigator                                                       | Group (if more than 1 Group listed in the byline) and/or Subgroup (eg, Steering Committee) |
|-----------------------------------|------------|-----------------------|------------------|------------------------------------------------------|------------------------------------------|---------------------------------------------------------------------------------------------------------------|--------------------------------------------------------------------------------------------|
| Marie                             | Ellestad   |                       | CCRP             | Froedtert Hospital                                   | Milwaukee, Wisconsin, U.S.A.             | Site Research Personnel                                                                                       |                                                                                            |
| Kate                              | Lewis      |                       | PharmD, BCPS     | Froedtert Hospital                                   | Milwaukee, Wisconsin, U.S.A.             | Site Research Pharmacy Personnel                                                                              |                                                                                            |
| Tom                               | Nelson     |                       | PharmD, RPh      | Froedtert Hospital                                   | Milwaukee, Wisconsin, U.S.A.             | Site Research Pharmacy Personnel                                                                              |                                                                                            |
| Nickolas                          | Reimer     |                       | MD               | Emory University Orthopedics and Spine Center        | Atlanta, Georgia, U.S.A.                 | Site Principal Investigator                                                                                   |                                                                                            |
| David                             | Monson     |                       | MD               | Emory University Orthopedics and Spine Center        | Atlanta, Georgia, U.S.A.                 | Site Co-investigator                                                                                          |                                                                                            |
| Shervin                           | Oskouei    |                       | MD               | Emory University Orthopedics and Spine Center        | Atlanta, Georgia, U.S.A.                 | Site Co-investigator                                                                                          |                                                                                            |
| Christina                         | Lomba      |                       | MS, CCRC         | Emory University Orthopedics and Spine Center        | Atlanta, Georgia, U.S.A.                 | Site Research Personnel                                                                                       |                                                                                            |
| Lauren                            | Glenney    |                       | MHSc, CCRP       | Emory University Orthopedics and Spine Center        | Atlanta, Georgia, U.S.A.                 | Site Research Personnel                                                                                       |                                                                                            |
| Susan                             | Rogers     |                       | RPh              | Emory University Orthopedics and Spine Center        | Atlanta, Georgia, U.S.A.                 | Site Research Pharmacy Personnel                                                                              |                                                                                            |
| Howard                            | Goodman    |                       | MD               | Long Island Jewish Medical Center [Northwell Health] | New Hyde Park, New York, U.S.A.          | Site Principal Investigator (Long Island Jewish Medical Center [Northwell Health], Maimonides Medical Center) |                                                                                            |
| Marlena                           | McGill     |                       | MPH              | Long Island Jewish Medical Center [Northwell Health] | New Hyde Park, New York, U.S.A.          | Site Research Personnel                                                                                       |                                                                                            |



## Supplemental Online Content: Nonauthor Collaborators

\*Indicates required information. Only first name, last name, and suffix will appear in PubMed.

| *First Name and Middle Initial(s) | *Last Name     | *Suffix (eg, Jr, III) | Academic Degrees | Institution                                          | Location (city, state/province, country) | Role or Contribution, eg, chair, principal investigator | Group (if more than 1 Group listed in the byline) and/or Subgroup (eg, Steering Committee) |
|-----------------------------------|----------------|-----------------------|------------------|------------------------------------------------------|------------------------------------------|---------------------------------------------------------|--------------------------------------------------------------------------------------------|
| Peter                             | Olivares       |                       | BSc              | Long Island Jewish Medical Center [Northwell Health] | New Hyde Park, New York, U.S.A.          | Site Research Personnel                                 |                                                                                            |
| Francesca                         | Petrucelli     |                       | BA               | Long Island Jewish Medical Center [Northwell Health] | New Hyde Park, New York, U.S.A.          | Site Research Personnel                                 |                                                                                            |
| Uzma                              | Afzal          |                       | PharmD           | Long Island Jewish Medical Center [Northwell Health] | New Hyde Park, New York, U.S.A.          | Site Research Pharmacy Personnel                        |                                                                                            |
| Zina                              | Faynblat       |                       | RPh              | Long Island Jewish Medical Center [Northwell Health] | New Hyde Park, New York, U.S.A.          | Site Research Pharmacy Personnel                        |                                                                                            |
| Elizabeth                         | Mathew         |                       | RPh              | Long Island Jewish Medical Center [Northwell Health] | New Hyde Park, New York, U.S.A.          | Site Research Pharmacy Personnel                        |                                                                                            |
| Wanda                             | Bell-Farrell   |                       | RN, MS, CCRP     | Sinai Hospital of Baltimore [Lifebridge Health]      | Baltimore, Maryland, U.S.A.              | Site Research Personnel                                 |                                                                                            |
| Judith                            | Bosley         |                       | RN, BSN          | Sinai Hospital of Baltimore [Lifebridge Health]      | Baltimore, Maryland, U.S.A.              | Site Research Personnel                                 |                                                                                            |
| Corilynn                          | Hughes         |                       | RN, BSN, OCN     | Sinai Hospital of Baltimore [Lifebridge Health]      | Baltimore, Maryland, U.S.A.              | Site Research Personnel                                 |                                                                                            |
| Ukeme                             | Ikiddeh-Barnes |                       | RN               | Sinai Hospital of Baltimore [Lifebridge Health]      | Baltimore, Maryland, U.S.A.              | Site Research Personnel                                 |                                                                                            |
| Ashley                            | Jones          |                       | BS               | Sinai Hospital of Baltimore [Lifebridge Health]      | Baltimore, Maryland, U.S.A.              | Site Research Personnel                                 |                                                                                            |
| Melissa                           | Loomis         |                       | CCRP             | Sinai Hospital of Baltimore [Lifebridge Health]      | Baltimore, Maryland, U.S.A.              | Site Research Personnel                                 |                                                                                            |
| Alexis                            | Solis          |                       | BS               | Sinai Hospital of Baltimore [Lifebridge Health]      | Baltimore, Maryland, U.S.A.              | Site Research Personnel                                 |                                                                                            |
| Christine                         | Wade           |                       | BA               | Sinai Hospital of Baltimore [Lifebridge Health]      | Baltimore, Maryland, U.S.A.              | Site Research Personnel                                 |                                                                                            |

## Supplemental Online Content: Nonauthor Collaborators

\*Indicates required information. Only first name, last name, and suffix will appear in PubMed.

| *First Name and Middle Initial(s) | *Last Name | *Suffix (eg, Jr, III) | Academic Degrees | Institution                                     | Location (city, state/province, country) | Role or Contribution, eg, chair, principal investigator | Group (if more than 1 Group listed in the byline) and/or Subgroup (eg, Steering Committee) |
|-----------------------------------|------------|-----------------------|------------------|-------------------------------------------------|------------------------------------------|---------------------------------------------------------|--------------------------------------------------------------------------------------------|
| Stephanie                         | Friedman   |                       | PharmD           | Sinai Hospital of Baltimore [Lifebridge Health] | Baltimore, Maryland, U.S.A.              | Site Research Pharmacy Personnel                        |                                                                                            |
| Chukwuemeka N.                    | Nzelibe    |                       | PharmD           | Sinai Hospital of Baltimore [Lifebridge Health] | Baltimore, Maryland, U.S.A.              | Site Research Pharmacy Personnel                        |                                                                                            |
| Katiri                            | Wagner     |                       | BS               | Beth Israel Deaconess Medical Center            | Boston, Massachusetts, U.S.A.            | Site Research Personnel                                 |                                                                                            |
| Hina A.                           | Jolin      |                       | PharmD           | Beth Israel Deaconess Medical Center            | Boston, Massachusetts, U.S.A.            | Site Research Pharmacy Personnel                        |                                                                                            |
| Heena                             | Patel      |                       | RPh              | Beth Israel Deaconess Medical Center            | Boston, Massachusetts, U.S.A.            | Site Research Pharmacy Personnel                        |                                                                                            |
| Joel                              | Sorger     |                       | MD               | Cincinnati Children's Hospital                  | Cincinnati, Ohio, U.S.A.                 | Site Principal Investigator                             |                                                                                            |
| Nichole                           | Leitsinger |                       | BS, CCRP         | Cincinnati Children's Hospital                  | Cincinnati, Ohio, U.S.A.                 | Site Research Personnel                                 |                                                                                            |
| Krista                            | Carpenter  |                       | APRN             | Cincinnati Children's Hospital                  | Cincinnati, Ohio, U.S.A.                 | Site Research Pharmacy Personnel                        |                                                                                            |
| Denise                            | LaGory     |                       | RPh              | Cincinnati Children's Hospital                  | Cincinnati, Ohio, U.S.A.                 | Site Research Pharmacy Personnel                        |                                                                                            |
| Steven                            | Thorpe     |                       | MD               | University of California, Davis Medical Center  | Sacramento, California, U.S.A.           | Site Principal Investigator                             |                                                                                            |
| Shari Lynn                        | Nichols    |                       | CCRP, ADN        | University of California, Davis Medical Center  | Sacramento, California, U.S.A.           | Site Research Personnel                                 |                                                                                            |
| Patrick                           | Febre      |                       | PharmD           | University of California, Davis Medical Center  | Sacramento, California, U.S.A.           | Site Research Pharmacy Personnel                        |                                                                                            |

## Supplemental Online Content: Nonauthor Collaborators

\*Indicates required information. Only first name, last name, and suffix will appear in PubMed.

| *First Name and Middle Initial(s) | *Last Name | *Suffix (eg, Jr, III) | Academic Degrees | Institution                                          | Location (city, state/province, country) | Role or Contribution, eg, chair, principal investigator | Group (if more than 1 Group listed in the byline) and/or Subgroup (eg, Steering Committee) |
|-----------------------------------|------------|-----------------------|------------------|------------------------------------------------------|------------------------------------------|---------------------------------------------------------|--------------------------------------------------------------------------------------------|
| Jacob                             | Monares    |                       | CPhT             | University of California, Davis Medical Center       | Sacramento, California, U.S.A.           | Site Research Pharmacy Personnel                        |                                                                                            |
| Kimmai                            | Nguyen     |                       | PharmD           | University of California, Davis Medical Center       | Sacramento, California, U.S.A.           | Site Research Pharmacy Personnel                        |                                                                                            |
| Nadir                             | Sarwary    |                       | CPhT             | University of California, Davis Medical Center       | Sacramento, California, U.S.A.           | Site Research Pharmacy Personnel                        |                                                                                            |
| Peter                             | Trovitch   |                       | PharmD           | University of California, Davis Medical Center       | Sacramento, California, U.S.A.           | Site Research Pharmacy Personnel                        |                                                                                            |
| Nicholas                          | Bernthal   |                       | MD               | University of California, Los Angeles Medical Center | Los Angeles, California, U.S.A.          | Site Principal Investigator                             |                                                                                            |
| Jeffrey                           | Eckardt    |                       | MD               | University of California, Los Angeles Medical Center | Los Angeles, California, U.S.A.          | Site Co-investigator                                    |                                                                                            |
| Francis                           | Hornicek   |                       | MD, PhD          | University of California, Los Angeles Medical Center | Los Angeles, California, U.S.A.          | Site Co-investigator                                    |                                                                                            |
| Stephen                           | Zoller     |                       | MD               | University of California, Los Angeles Medical Center | Los Angeles, California, U.S.A.          | Site Research Personnel                                 |                                                                                            |
| Gloria                            | Kiel       |                       |                  | University of California, Los Angeles Medical Center | Los Angeles, California, U.S.A.          | Site Research Personnel                                 |                                                                                            |
| Jason                             | Madamba    |                       | PharmD, BCPS     | University of California, Los Angeles Medical Center | Los Angeles, California, U.S.A.          | Site Research Pharmacy Personnel                        |                                                                                            |
| Christina                         | Shin       |                       | PharmD           | University of California, Los Angeles Medical Center | Los Angeles, California, U.S.A.          | Site Research Pharmacy Personnel                        |                                                                                            |

## Supplemental Online Content: Nonauthor Collaborators

\*Indicates required information. Only first name, last name, and suffix will appear in PubMed.

| *First Name and Middle Initial(s) | *Last Name         | *Suffix (eg, Jr, III) | Academic Degrees | Institution                                 | Location (city, state/province, country) | Role or Contribution, eg, chair, principal investigator       | Group (if more than 1 Group listed in the byline) and/or Subgroup (eg, Steering Committee) |
|-----------------------------------|--------------------|-----------------------|------------------|---------------------------------------------|------------------------------------------|---------------------------------------------------------------|--------------------------------------------------------------------------------------------|
| Adam                              | Lindsay            |                       | MD               | Hartford Hospital                           | Hartford, Connecticut                    | Site Principal Investigator (Hartford Hospital, UConn Health) |                                                                                            |
| Jamie                             | Fish-Fuhrmann      |                       | BS               | Hartford Hospital                           | Hartford, Connecticut                    | Site Research Personnel                                       |                                                                                            |
| Maya                              | Culbertson         |                       | MS               | Maimonides Medical Center                   | New York City, New York, U.S.A.          | Site Research Personnel                                       |                                                                                            |
| Patricia                          | Caruso-Prendergast |                       | MS, PharmD, BCPS | Maimonides Medical Center                   | New York City, New York, U.S.A.          | Site Research Pharmacy Personnel                              |                                                                                            |
| Emily                             | Garling            |                       | PharmD           | Maimonides Medical Center                   | New York City, New York, U.S.A.          | Site Research Pharmacy Personnel                              |                                                                                            |
| Richard                           | Nicholas           |                       | MD               | University of Arkansas for Medical Sciences | Little Rock, Arkansas, U.S.A.            | Site Principal Investigator                                   |                                                                                            |
| Corey                             | Montgomery         |                       | MD               | University of Arkansas for Medical Sciences | Little Rock, Arkansas, U.S.A.            | Site Co-investigator                                          |                                                                                            |
| J. Aaron                          | Holley             |                       | BS               | University of Arkansas for Medical Sciences | Little Rock, Arkansas, U.S.A.            | Site Research Personnel                                       |                                                                                            |
| Rachel                            | Jones              |                       | MSc              | University of Arkansas for Medical Sciences | Little Rock, Arkansas, U.S.A.            | Site Research Personnel                                       |                                                                                            |
| Melissa                           | McAdoo             |                       | BSN              | University of Arkansas for Medical Sciences | Little Rock, Arkansas, U.S.A.            | Site Research Personnel                                       |                                                                                            |
| Daisy                             | Wade               |                       | BA               | University of Arkansas for Medical Sciences | Little Rock, Arkansas, U.S.A.            | Site Research Personnel                                       |                                                                                            |
| Mindy                             | Caid               |                       | BS               | University of Arkansas for Medical Sciences | Little Rock, Arkansas, U.S.A.            | Site Research Pharmacy Personnel                              |                                                                                            |

## Supplemental Online Content: Nonauthor Collaborators

\*Indicates required information. Only first name, last name, and suffix will appear in PubMed.

| *First Name and Middle Initial(s) | *Last Name | *Suffix (eg, Jr, III) | Academic Degrees | Institution                                 | Location (city, state/province, country) | Role or Contribution, eg, chair, principal investigator | Group (if more than 1 Group listed in the byline) and/or Subgroup (eg, Steering Committee) |
|-----------------------------------|------------|-----------------------|------------------|---------------------------------------------|------------------------------------------|---------------------------------------------------------|--------------------------------------------------------------------------------------------|
| Amy                               | Crisp      |                       | PharmD           | University of Arkansas for Medical Sciences | Little Rock, Arkansas, U.S.A.            | Site Research Pharmacy Personnel                        |                                                                                            |
| Jennifer                          | Roberts    |                       | PharmD           | University of Arkansas for Medical Sciences | Little Rock, Arkansas, U.S.A.            | Site Research Pharmacy Personnel                        |                                                                                            |
| Tess                              | Balach     |                       | MD               | UConn Health                                | Farmington, Connecticut, U.S.A.          | Site Principal Investigator                             |                                                                                            |
| Mark                              | Cote       |                       | PT, DPT, MS      | UConn Health                                | Farmington, Connecticut, U.S.A.          | Site Research Personnel                                 |                                                                                            |
| Kathleen                          | Coyle      |                       | RN, BSN, MPH     | UConn Health                                | Farmington, Connecticut, U.S.A.          | Site Research Personnel                                 |                                                                                            |
| Kelly                             | Rushlow    |                       | BA               | UConn Health                                | Farmington, Connecticut, U.S.A.          | Site Research Personnel                                 |                                                                                            |
| Ruth                              | LaCasse    |                       | RPh              | UConn Health                                | Farmington, Connecticut, U.S.A.          | Site Research Pharmacy Personnel                        |                                                                                            |
| Daniel                            | Lerman     |                       | MD               | University of Maryland Medical Center       | Baltimore, Maryland, U.S.A.              | Site Principal Investigator                             |                                                                                            |
| Andrea                            | Howe       |                       | BS               | University of Maryland Medical Center       | Baltimore, Maryland, U.S.A.              | Site Research Personnel                                 |                                                                                            |
| Prashant                          | Patel      |                       | PharmD           | University of Maryland Medical Center       | Baltimore, Maryland, U.S.A.              | Site Research Pharmacy Personnel                        |                                                                                            |
| Andrew                            | Phan       |                       | PharmD           | University of Maryland Medical Center       | Baltimore, Maryland, U.S.A.              | Site Research Pharmacy Personnel                        |                                                                                            |
| Shinyi                            | Telscher   |                       | PharmD, CCRP     | University of Maryland Medical Center       | Baltimore, Maryland, U.S.A.              | Site Research Pharmacy Personnel                        |                                                                                            |

## Supplemental Online Content: Nonauthor Collaborators

\*Indicates required information. Only first name, last name, and suffix will appear in PubMed.

| *First Name and Middle Initial(s) | *Last Name    | *Suffix (eg, Jr, III) | Academic Degrees | Institution                             | Location (city, state/province, country) | Role or Contribution, eg, chair, principal investigator | Group (if more than 1 Group listed in the byline) and/or Subgroup (eg, Steering Committee) |
|-----------------------------------|---------------|-----------------------|------------------|-----------------------------------------|------------------------------------------|---------------------------------------------------------|--------------------------------------------------------------------------------------------|
| Kurt                              | Weiss         |                       | MD               | University of Pittsburgh Medical Center | Pittsburgh, Pennsylvania, U.S.A.         | Site Principal Investigator                             |                                                                                            |
| Mark                              | Goodman       |                       | MD               | University of Pittsburgh Medical Center | Pittsburgh, Pennsylvania, U.S.A.         | Site Co-investigator                                    |                                                                                            |
| Alma                              | Heyl          |                       | CCRC, LAS        | University of Pittsburgh Medical Center | Pittsburgh, Pennsylvania, U.S.A.         | Site Research Personnel                                 |                                                                                            |
| Chris                             | Korenski      |                       | PharmD           | University of Pittsburgh Medical Center | Pittsburgh, Pennsylvania, U.S.A.         | Site Research Pharmacy Personnel                        |                                                                                            |
| Chris Ann                         | Yeschke       |                       | PharmD           | University of Pittsburgh Medical Center | Pittsburgh, Pennsylvania, U.S.A.         | Site Research Pharmacy Personnel                        |                                                                                            |
| Thomas                            | Scharschmidt  |                       | MD               | Wexner Medical Center                   | Columbus, Ohio, U.S.A.                   | Site Principal Investigator                             |                                                                                            |
| Joel                              | Mayerson      |                       | MD               | Wexner Medical Center                   | Columbus, Ohio, U.S.A.                   | Site Co-investigator                                    |                                                                                            |
| Martha                            | Crist         |                       | RN               | Wexner Medical Center                   | Columbus, Ohio, U.S.A.                   | Site Research Personnel                                 |                                                                                            |
| Hallie                            | Barr          |                       | PharmD, BCOP     | Wexner Medical Center                   | Columbus, Ohio, U.S.A.                   | Site Research Pharmacy Personnel                        |                                                                                            |
| Shah Alam                         | Khan          |                       | MS (Ortho)       | All India Institute of Medical Sciences | New Delhi, India                         | Site Principal Investigator                             |                                                                                            |
| Venkatesan                        | Sampath Kumar |                       | MS (Ortho)       | All India Institute of Medical Sciences | New Delhi, India                         | Site Co-investigator                                    |                                                                                            |
| Abhinav                           | Agarwal       |                       | MS (Ortho)       | All India Institute of Medical Sciences | New Delhi, India                         | Site Research Personnel                                 |                                                                                            |
| Roshan                            | Banjara       |                       | MS (Ortho)       | All India Institute of Medical Sciences | New Delhi, India                         | Site Research Personnel                                 |                                                                                            |

## Supplemental Online Content: Nonauthor Collaborators

\*Indicates required information. Only first name, last name, and suffix will appear in PubMed.

| *First Name and Middle Initial(s) | *Last Name       | *Suffix (eg, Jr, III) | Academic Degrees | Institution                                                         | Location (city, state/province, country) | Role or Contribution, eg, chair, principal investigator | Group (if more than 1 Group listed in the byline) and/or Subgroup (eg, Steering Committee) |
|-----------------------------------|------------------|-----------------------|------------------|---------------------------------------------------------------------|------------------------------------------|---------------------------------------------------------|--------------------------------------------------------------------------------------------|
| Sanjay                            | Oli              |                       | BA (Sociology)   | All India Institute of Medical Sciences                             | New Delhi, India                         | Site Research Personnel                                 |                                                                                            |
| André Mathias                     | Baptista         |                       | MD, PhD          | Instituto de Ortopedia e Traumatologia da Universidade de São Paulo | São Paulo, Brazil                        | Site Principal Investigator                             |                                                                                            |
| Olavo                             | Pires de Camargo |                       | MD, PhD          | Instituto de Ortopedia e Traumatologia da Universidade de São Paulo | São Paulo, Brazil                        | Site Co-investigator                                    |                                                                                            |
| Juan Pablo                        | Zumárraga        |                       | MD, MSc, PhD     | Instituto de Ortopedia e Traumatologia da Universidade de São Paulo | São Paulo, Brazil                        | Site Co-investigator                                    |                                                                                            |
| Juliana                           | Freitar          |                       | RN               | Instituto de Ortopedia e Traumatologia da Universidade de São Paulo | São Paulo, Brazil                        | Site Research Pharmacy Personnel                        |                                                                                            |
| Ismael                            | Agomes           |                       | RN               | Instituto de Ortopedia e Traumatologia da Universidade de São Paulo | São Paulo, Brazil                        | Site Research Pharmacy Personnel                        |                                                                                            |
| P.D. Sander                       | Dijkstra         |                       | MD, PhD          | Leiden University Medical Center                                    | Leiden, the Netherlands                  | Site Principal Investigator                             |                                                                                            |
| Michiel                           | van de Sande     |                       | MD, PhD          | Leiden University Medical Center                                    | Leiden, the Netherlands                  | Site Co-Principal Investigator                          |                                                                                            |
| Philip                            | Sanders          |                       | MD               | Leiden University Medical Center                                    | Leiden, the Netherlands                  | Site Research Personnel                                 |                                                                                            |
| Sarah                             | Bosma            |                       | MD               | Leiden University Medical Center                                    | Leiden, the Netherlands                  | Site Research Personnel                                 |                                                                                            |
| Marieke Afra                      | Toi              |                       | PharmD           | Leiden University Medical Center                                    | Leiden, the Netherlands                  | Site Research Pharmacy Personnel                        |                                                                                            |
| Marcos Galli                      | Serra            |                       | MD               | Hospital Universitario Austral                                      | Buenos Aires, Argentina                  | Site Principal Investigator                             |                                                                                            |

## Supplemental Online Content: Nonauthor Collaborators

\*Indicates required information. Only first name, last name, and suffix will appear in PubMed.

| *First Name and Middle Initial(s) | *Last Name | *Suffix (eg, Jr, III) | Academic Degrees | Institution                                                              | Location (city, state/province, country) | Role or Contribution, eg, chair, principal investigator | Group (if more than 1 Group listed in the byline) and/or Subgroup (eg, Steering Committee) |
|-----------------------------------|------------|-----------------------|------------------|--------------------------------------------------------------------------|------------------------------------------|---------------------------------------------------------|--------------------------------------------------------------------------------------------|
| Walter                            | Parizzia   |                       | MD               | Hospital Universitario Austral                                           | Buenos Aires, Argentina                  | Site Co-investigator                                    |                                                                                            |
| Gabriela                          | Marinsalta |                       | BIOCH            | Hospital Universitario Austral                                           | Buenos Aires, Argentina                  | Site Research Personnel                                 |                                                                                            |
| Angela                            | Podrzaj    |                       |                  | Hospital Universitario Austral                                           | Buenos Aires, Argentina                  | Site Research Personnel                                 |                                                                                            |
| Mariana Foa                       | Torres     |                       | RN               | Hospital Universitario Austral                                           | Buenos Aires, Argentina                  | Site Research Pharmacy Personnel                        |                                                                                            |
| Manuel                            | Pérez      |                       | MD               | Hospital Vall d'Hebron                                                   | Barcelona, Spain                         | Site Co-investigator                                    |                                                                                            |
| Lourdes Girona                    | Brumós     |                       | PharmD           | Hospital Vall d'Hebron                                                   | Barcelona, Spain                         | Site Research Pharmacy Personnel                        |                                                                                            |
| Pilar                             | Suñé       |                       | PharmD           | Hospital Vall d'Hebron                                                   | Barcelona, Spain                         | Site Research Pharmacy Personnel                        |                                                                                            |
| Reitze                            | Rodseth    |                       | MD, PhD          | School of Clinical Medicine, University of KwaZulu-Natal/Grey's Hospital | Pietermaritzburg, South Africa           | Site Principal Investigator                             |                                                                                            |
| Leonard                           | Marais     |                       | MD, PhD          | School of Clinical Medicine, University of KwaZulu-Natal/Grey's Hospital | Pietermaritzburg, South Africa           | Site Co-Principal Investigator                          |                                                                                            |
| Luan                              | Nieuwoudt  |                       | MD               | School of Clinical Medicine, University of KwaZulu-Natal/Grey's Hospital | Pietermaritzburg, South Africa           | Site Co-investigator                                    |                                                                                            |
| Chantal                           | Rajah      |                       | MD               | School of Clinical Medicine, University of KwaZulu-Natal/Grey's Hospital | Pietermaritzburg, South Africa           | Site Co-investigator                                    |                                                                                            |



## Supplemental Online Content: Nonauthor Collaborators

\*Indicates required information. Only first name, last name, and suffix will appear in PubMed.

| *First Name and Middle Initial(s) | *Last Name  | *Suffix (eg, Jr, III) | Academic Degrees | Institution                                                              | Location (city, state/province, country) | Role or Contribution, eg, chair, principal investigator | Group (if more than 1 Group listed in the byline) and/or Subgroup (eg, Steering Committee) |
|-----------------------------------|-------------|-----------------------|------------------|--------------------------------------------------------------------------|------------------------------------------|---------------------------------------------------------|--------------------------------------------------------------------------------------------|
| Simphiwe                          | Gumede      |                       |                  | School of Clinical Medicine, University of KwaZulu-Natal/Grey's Hospital | Pietermaritzburg, South Africa           | Site Research Personnel                                 |                                                                                            |
| Andreas                           | Leithner    |                       | MD               | Medical University Graz                                                  | Graz, Austria                            | Site Principal Investigator                             |                                                                                            |
| Marko                             | Bergovec    |                       | MD               | Medical University Graz                                                  | Graz, Austria                            | Site Co-investigator                                    |                                                                                            |
| Andrea                            | Fink        |                       | MSc              | Medical University Graz                                                  | Graz, Austria                            | Site Research Personnel                                 |                                                                                            |
| Carina                            | Halb        |                       | Mag              | Medical University Graz                                                  | Graz, Austria                            | Site Research Pharmacy Personnel                        |                                                                                            |
| Ahmed                             | El Ghoneimy |                       | MD               | Children's Cancer Hospital Egypt                                         | Cairo, Egypt                             | Site Principal Investigator                             |                                                                                            |
| Dina                              | Elgalaly    |                       | BPharm           | Children's Cancer Hospital Egypt                                         | Cairo, Egypt                             | Site Research Pharmacy Personnel                        |                                                                                            |
| Nehal                             | Kamal       |                       | BPharm           | Children's Cancer Hospital Egypt                                         | Cairo, Egypt                             | Site Research Pharmacy Personnel                        |                                                                                            |
| Ricardo                           | Becker      |                       | MD, MSc, PhD     | Hospital de Clínicas de Porto Alegre                                     | Porto Alegre, Brazil                     | Site Principal Investigator                             |                                                                                            |
| Bruno Pereira                     | Antunes     |                       | MD, MSc          | Hospital de Clínicas de Porto Alegre                                     | Porto Alegre, Brazil                     | Site Co-investigator                                    |                                                                                            |
| Carlos Roberto                    | Galia       |                       | MD, MSc, PhD     | Hospital de Clínicas de Porto Alegre                                     | Porto Alegre, Brazil                     | Site Co-investigator                                    |                                                                                            |
| Julie F. Cerutti                  | Santos      |                       | RN, MSc          | Hospital de Clínicas de Porto Alegre                                     | Porto Alegre, Brazil                     | Site Research Personnel                                 |                                                                                            |
| Daniel                            | Fasolo      |                       | BPharm, MSc, PhD | Hospital de Clínicas de Porto Alegre                                     | Porto Alegre, Brazil                     | Site Research Pharmacy Personnel                        |                                                                                            |

## Supplemental Online Content: Nonauthor Collaborators

\*Indicates required information. Only first name, last name, and suffix will appear in PubMed.

| *First Name and Middle Initial(s) | *Last Name    | *Suffix (eg, Jr, III) | Academic Degrees                                                               | Institution                | Location (city, state/province, country) | Role or Contribution, eg, chair, principal investigator | Group (if more than 1 Group listed in the byline) and/or Subgroup (eg, Steering Committee) |
|-----------------------------------|---------------|-----------------------|--------------------------------------------------------------------------------|----------------------------|------------------------------------------|---------------------------------------------------------|--------------------------------------------------------------------------------------------|
| Mann Hong                         | Tan           |                       | MBBS (Singapore), FRCS (Edinburgh), FRCS (Glasgow), FAMS (Orthopaedic Surgery) | Singapore General Hospital | Singapore, Singapore                     | Site Principal Investigator                             |                                                                                            |
| Suraya                            | Zainul Abidin |                       | MBBS BSc (Hons), MMed (Ortho), FRCS (Edinburgh)                                | Singapore General Hospital | Singapore, Singapore                     | Site Co-investigator                                    |                                                                                            |
| Lai Ye                            | Cheang        |                       | MPharm                                                                         | Singapore General Hospital | Singapore, Singapore                     | Site Research Pharmacy Personnel                        |                                                                                            |
| Mark                              | Clayer        |                       | MD, MSc, MBBS                                                                  | Royal Adelaide Hospital    | Adelaide, Australia                      | Site Principal Investigator                             |                                                                                            |
| Jakub                             | Jagiello      |                       | MBBS                                                                           | Royal Adelaide Hospital    | Adelaide, Australia                      | Site Co-investigator                                    |                                                                                            |
| David                             | Morris        |                       | MD                                                                             | Royal Adelaide Hospital    | Adelaide, Australia                      | Site Co-investigator                                    |                                                                                            |
| Yee                               | Chai          |                       | BPharm                                                                         | Royal Adelaide Hospital    | Adelaide, Australia                      | Site Research Pharmacy Personnel                        |                                                                                            |

## Supplemental Online Content: Nonauthor Collaborators

\*Indicates required information. Only first name, last name, and suffix will appear in PubMed.

| *First Name and Middle Initial(s) | *Last Name | *Suffix (eg, Jr, III) | Academic Degrees     | Institution                         | Location (city, state/province, country) | Role or Contribution, eg, chair, principal investigator | Group (if more than 1 Group listed in the byline) and/or Subgroup (eg, Steering Committee) |
|-----------------------------------|------------|-----------------------|----------------------|-------------------------------------|------------------------------------------|---------------------------------------------------------|--------------------------------------------------------------------------------------------|
| Steven                            | Duong      |                       | BPharm               | Royal Adelaide Hospital             | Adelaide, Australia                      | Site Research Pharmacy Personnel                        |                                                                                            |
| Tran                              | Nguyen     |                       | BPharm               | Royal Adelaide Hospital             | Adelaide, Australia                      | Site Research Pharmacy Personnel                        |                                                                                            |
| Peter                             | Slobodian  |                       | BPharm, M Clin Pharm | Royal Adelaide Hospital             | Adelaide, Australia                      | Site Research Pharmacy Personnel                        |                                                                                            |
| Paul                              | Jutte      |                       | MD, PhD              | University Medical Center Groningen | Groningen, the Netherlands               | Site Principal Investigator                             |                                                                                            |
| Marlanka                          | Zuur       |                       | PhD                  | University Medical Center Groningen | Groningen, the Netherlands               | Site Research Pharmacy Personnel                        |                                                                                            |
