# Supplementary material for: Comparison of Prophylactic Intravenous Antibiotic Regimens After Endoprosthetic Reconstruction for Lower Extremity Bone Tumors: A Randomized Clinical Trial
Source: PubMed Central journal article supplement (PMC8739829; doi:10.1001/jamaoncol.2021.6628), 2022-01-06
Supplement: jamaoncol-e216628-s004.pdf [file jamaoncol-e216628-s004.pdf]

## Data Sharing Statement

Ghert. Comparison of Prophylactic Intravenous Antibiotic Regimens After Endoprosthetic Reconstruction for Lower Extremity Bone Tumors. *JAMA Oncol.* Published January 06, 2022. doi:10.1001/jamaoncol.2021.6628

### Data

**Data available:** Yes

**Data types:** Deidentified participant data

**How to access data:** A written request for access to the data must be submitted to the corresponding author via email at: [ghertm@mcmaster.ca](mailto:ghertm@mcmaster.ca).

**When available:** beginning date: 01-06-2023

### Supporting Documents

**Document types:** Statistical/analytic code, Informed consent form

**How to access documents:** A written request for access to the statistical/analytic code and Informed Consent Form must be submitted to the corresponding author via email at: [ghertm@mcmaster.ca](mailto:ghertm@mcmaster.ca).

**When available:** beginning date: 01-06-2023

### Additional Information

**Who can access the data:** Data will be made available to anyone requesting the data.

**Types of analyses:** Data will be made available for any purpose.

**Mechanisms of data availability:** Data will be made available to anyone requesting the data with a signed data access agreement.

**Any additional restrictions:** Data will only be made available one year after publication date or January 6, 2023, whichever comes last.
